# Supplementary material
Source: Frontiers journal article supplement (https://www.frontiersin.org/articles/1518807)
Supplement: Table_2.docx [file Table_2.docx]

**Table. S2 Antibodies**

| **Antibody name** | **Cat No.** | **Product no.** |
| --- | --- | --- |
| RAB35 Polyclonal antibody | 11329-2-AP | Proteintech |
| Beta Actin Monoclonal antibody | 60008-1-Ig | Proteintech |
| PI3 Kinase p85 Antibody | #4292 | CST |
| Phospho-PI3 Kinase p85 (Tyr458)/p55 (Tyr199) Antibody | #4228 | CST |
| AKT Monoclonal antibody | 60203-2-Ig | Proteintech |
| Phospho-AKT (Thr308) Polyclonal antibody | 29163-1-AP | Proteintech |
| mTOR Monoclonal antibody | 66888-1-Ig | Proteintech |
| Phospho-mTOR (Ser2448) Recombinant antibody | 80596-1-RR | Proteintech |
| HRP-conjugated Goat Anti-Rabbit IgG(H+L) | SA00001-2 | Proteintech |
| HRP-conjugated Goat Anti-Mouse IgG(H+L) | SA00001-1 | Proteintech |
